# Supplementary material for: Trametes hirsuta as an Attractive Biocatalyst for the Preparative Scale Biotransformation of Isosafrole into Piperonal
Source: MDPI journal article supplement (doi:10.3390/molecules28083643), 2023-04-21
Supplement: s1 [file s1]

# Supplementary Materials

## ***Trametes hirsuta* as an attractive biocatalyst for the preparative scale biotransformation of isosafrole into piperonal**

**Dawid Hernik <sup>1,\*</sup>, Ewa Szczepańska <sup>1</sup>, Elisabetta Brenna <sup>2</sup>, Katarzyna Patejuk <sup>3</sup>, Teresa Olejniczak <sup>1</sup>, Tomasz Strzala <sup>4</sup> and Filip Boratyński <sup>1,\*</sup>**

<sup>1</sup> Department of Food Chemistry and Biocatalysis, Wrocław University of Environmental and Life Sciences, Norwida 25, 50-375 Wrocław, Poland; dawid.hernik@upwr.edu.pl (D.H.); ewa.szczepanska@upwr.edu.pl (E.S.), teresa.olejniczak@upwr.edu.pl (T.O.), filip.boratynski@upwr.edu.pl (F.B)

<sup>2</sup> Dipartimento di Chimica, Materiali ed Ingegneria Chimica "Giulio Natta" Politecnico di Milano, Via Mancinelli 7, I-20131 Milan, Italy; mariaelisabetta.brenna@polimi.it (E.B.)

<sup>3</sup> Department of Plant Protection, Wrocław University of Environmental and Life Sciences, Grunwald Square 24A, 50-363 Wrocław, Poland; katarzyna.patejuk@upwr.edu.pl (K.P.);

<sup>4</sup> Department of Genetics, Wrocław University of Environmental and Life Sciences, ul. Kozuchowska 7, 51-631 Wrocław, Poland; tomasz.strzala@upwr.edu.pl (T.S.);

\* Correspondence: dawid.hernik@upwr.edu.pl (D.H.), filip.boratynski@upwr.edu.pl (F.B.)

Number of pages: 9

Number of figures: 10

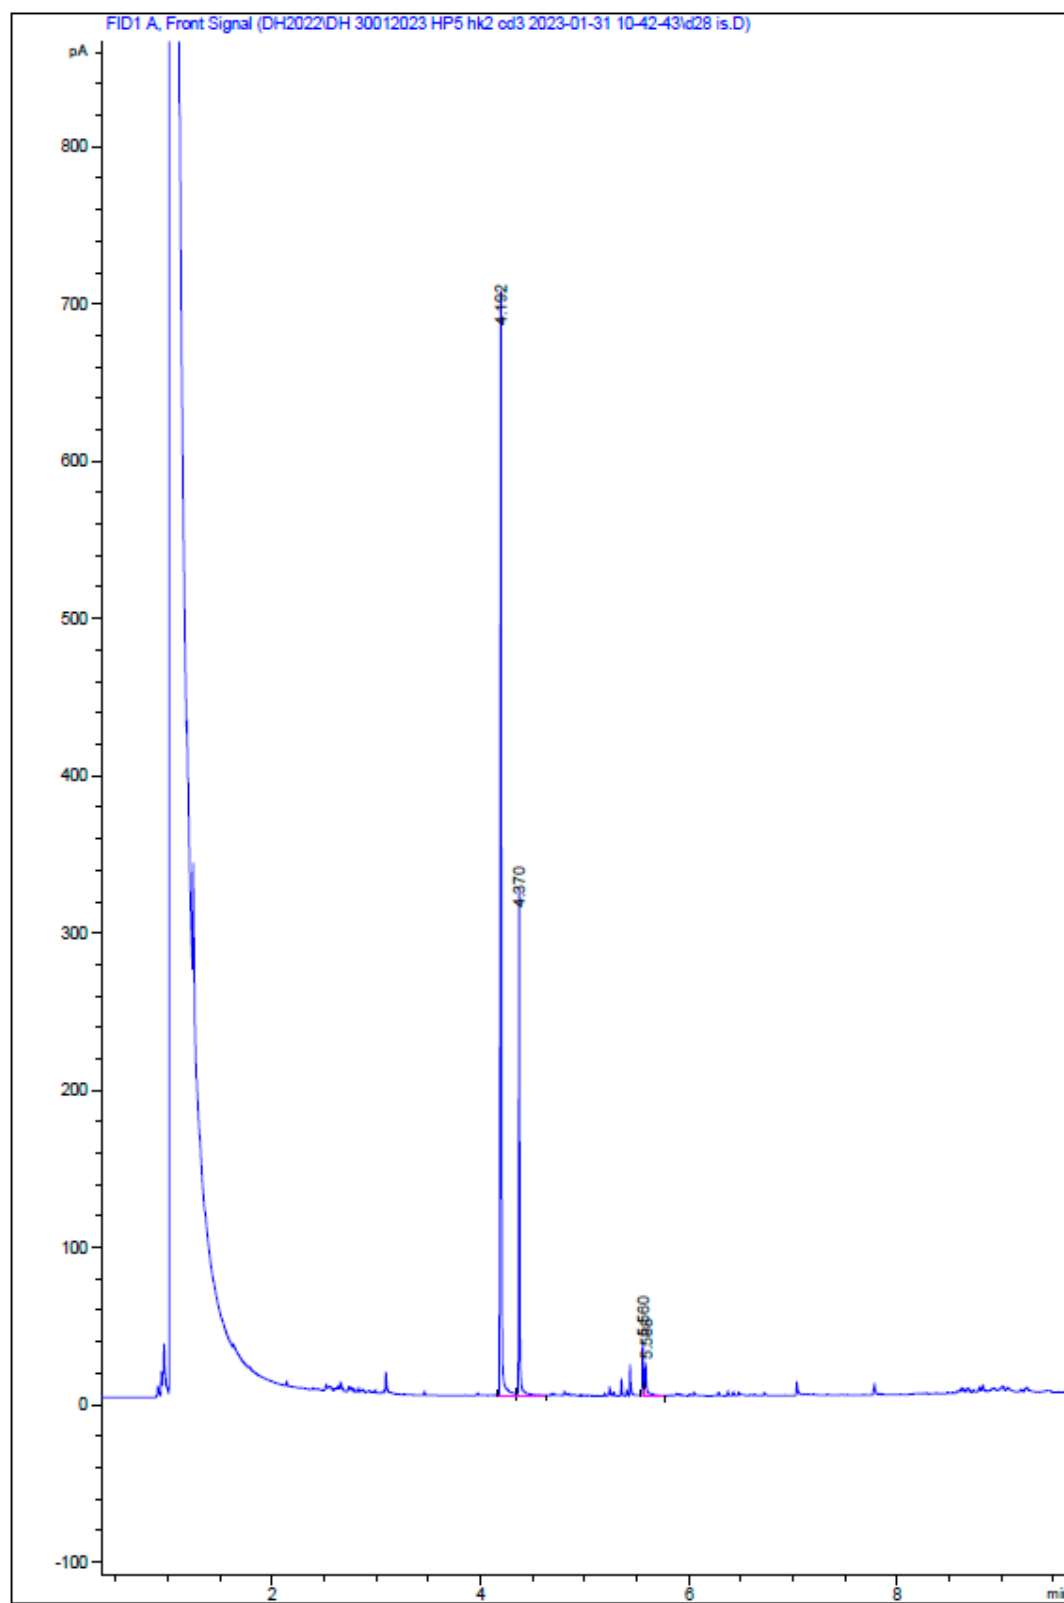

**Figure S1.** Chromatogram of the preparative scale biotransformation of isosafrole (**1a**) to piperonal (**1b**) with *T. hirsuta* d28 after 11 days.

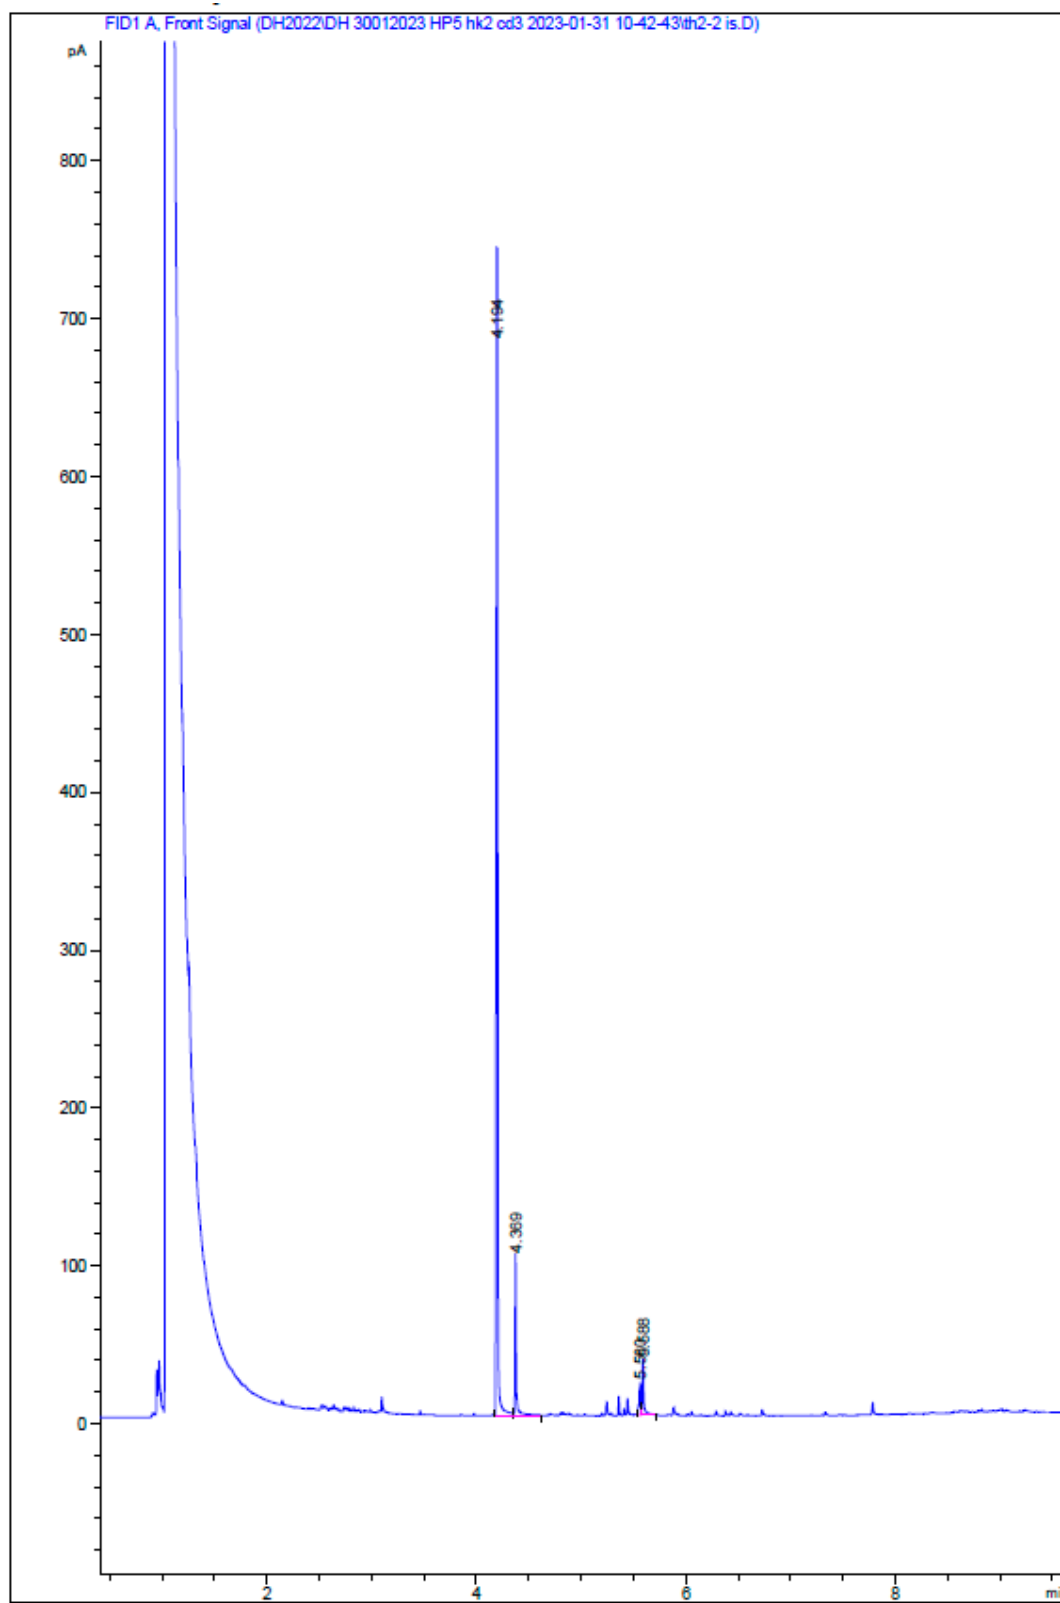

**Figure S2.** Chromatogram of the preparative scale biotransformation of isosafrole (**1a**) to piperonal (**1b**) with *T. hirsuta* TH2\_2 after 11 days.

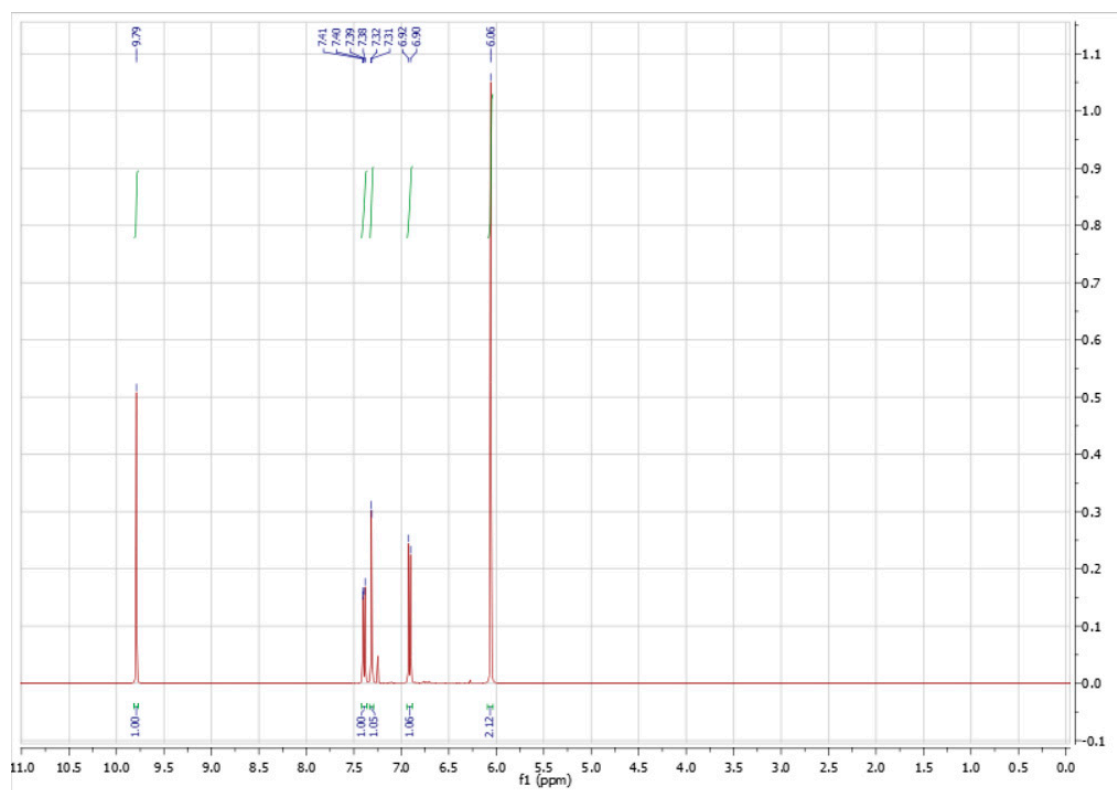

Figure S3. <sup>1</sup>H NMR spectrum of piperonal (**1b**).

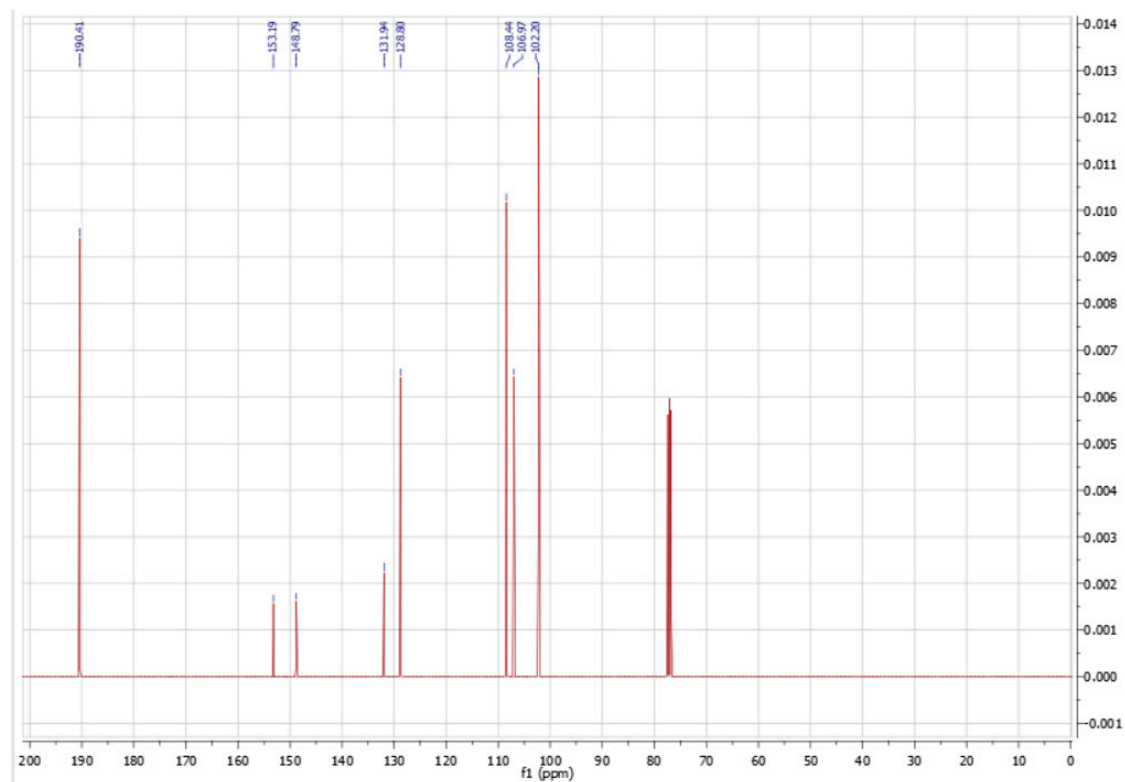

Figure S4. <sup>13</sup>C NMR spectrum of piperonal (**1b**).

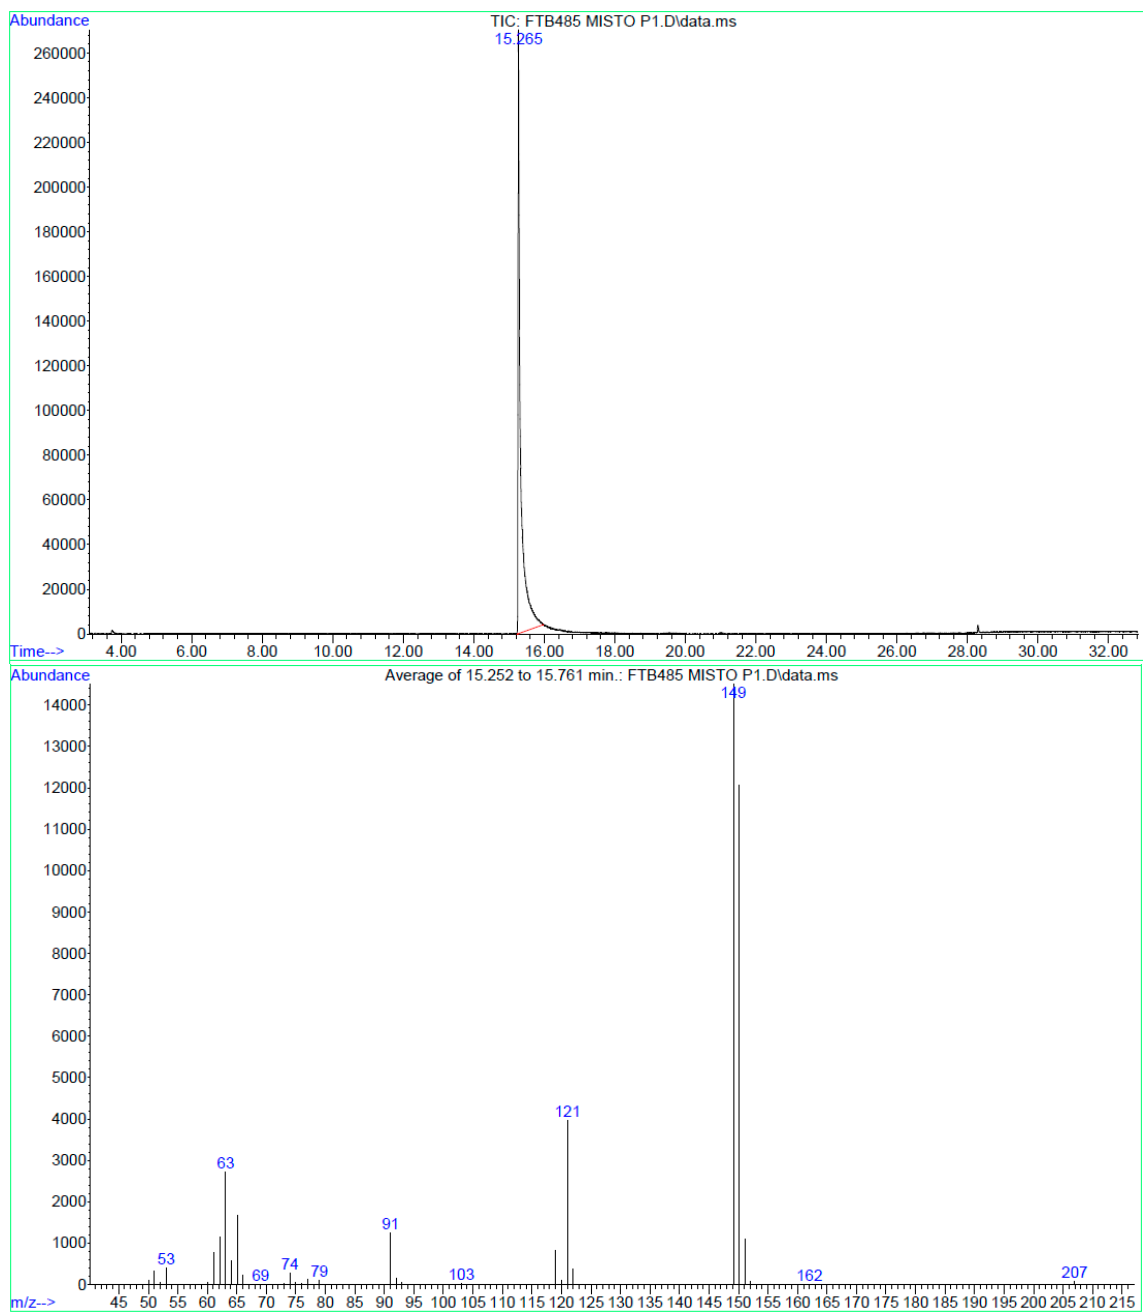

**Figure S5.** GC/MS chromatogram of piperonal (**1b**).

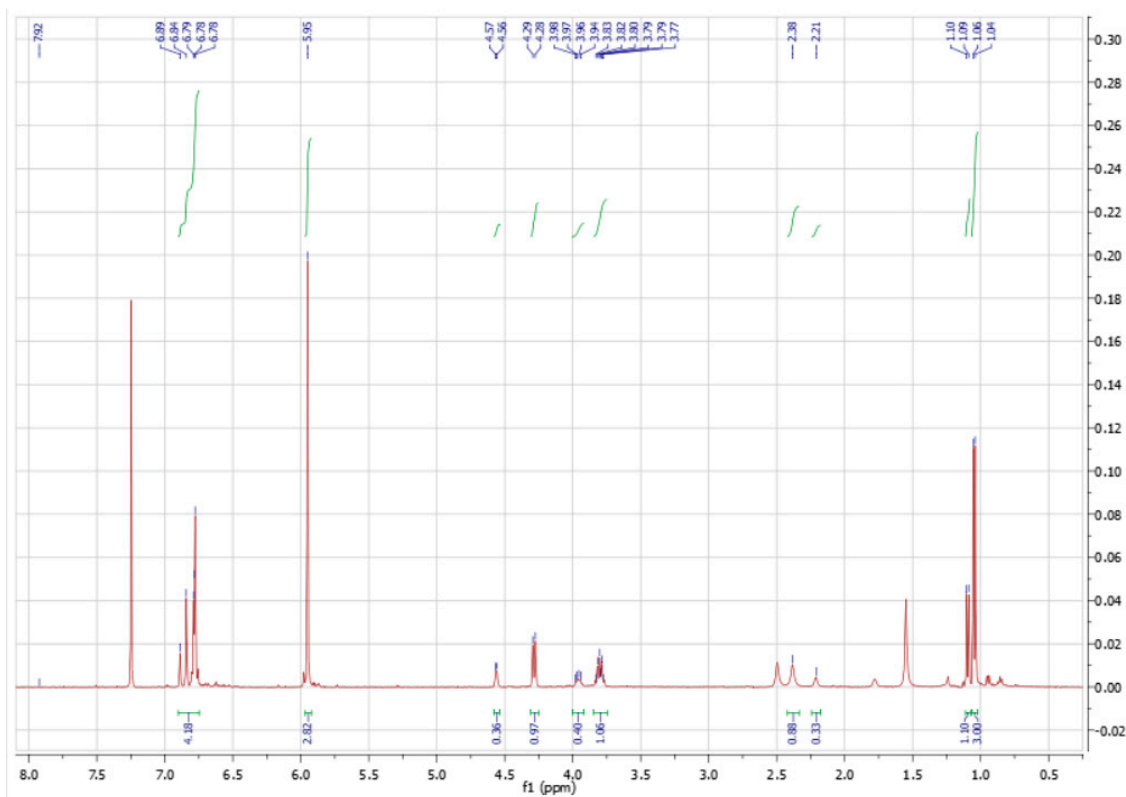

**Figure S6.**  $^1\text{H}$  NMR spectrum of  $(1R^*,2S^*)$  and  $(1R^*,2R^*)$ -1-(benzo[1,3]dioxol-5-yl)propane-1,2-diol (**1c**).

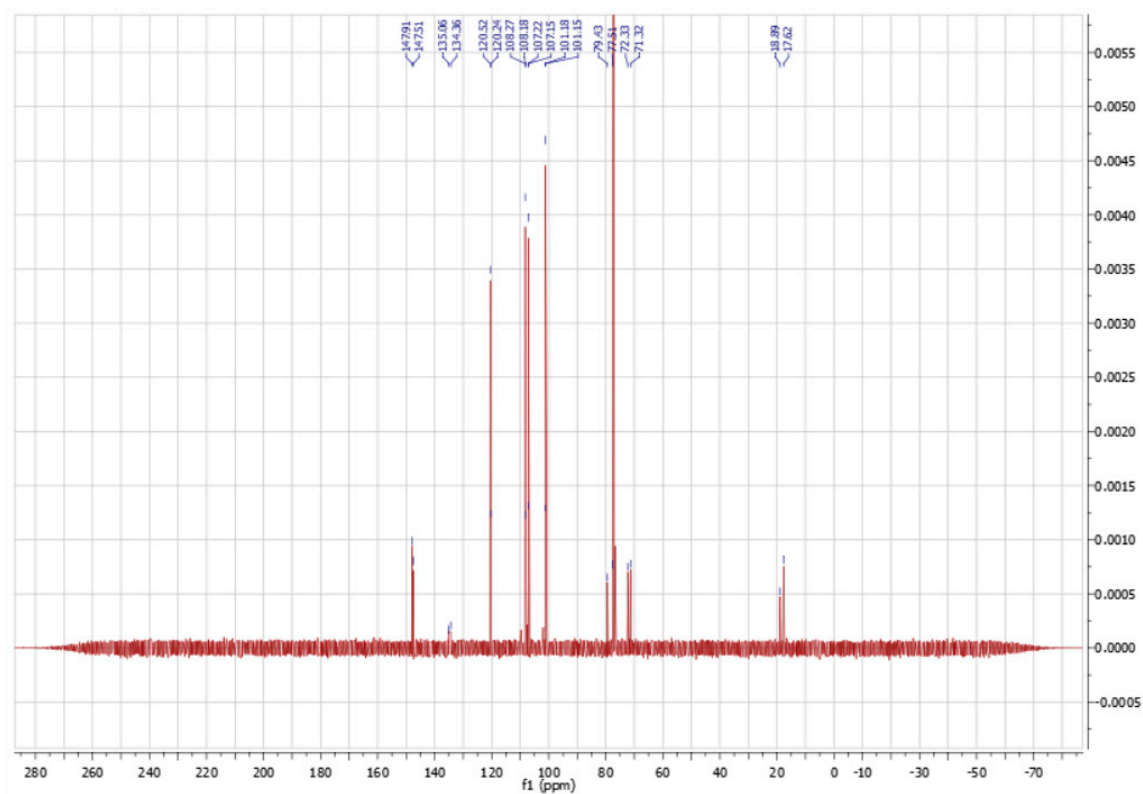

**Figure S7.**  $^{13}\text{C}$  NMR spectrum of  $(1R^*,2S^*)$  and  $(1R^*,2R^*)$ -1-(benzo[1,3]dioxol-5-yl)propane-1,2-diol (**1c**).

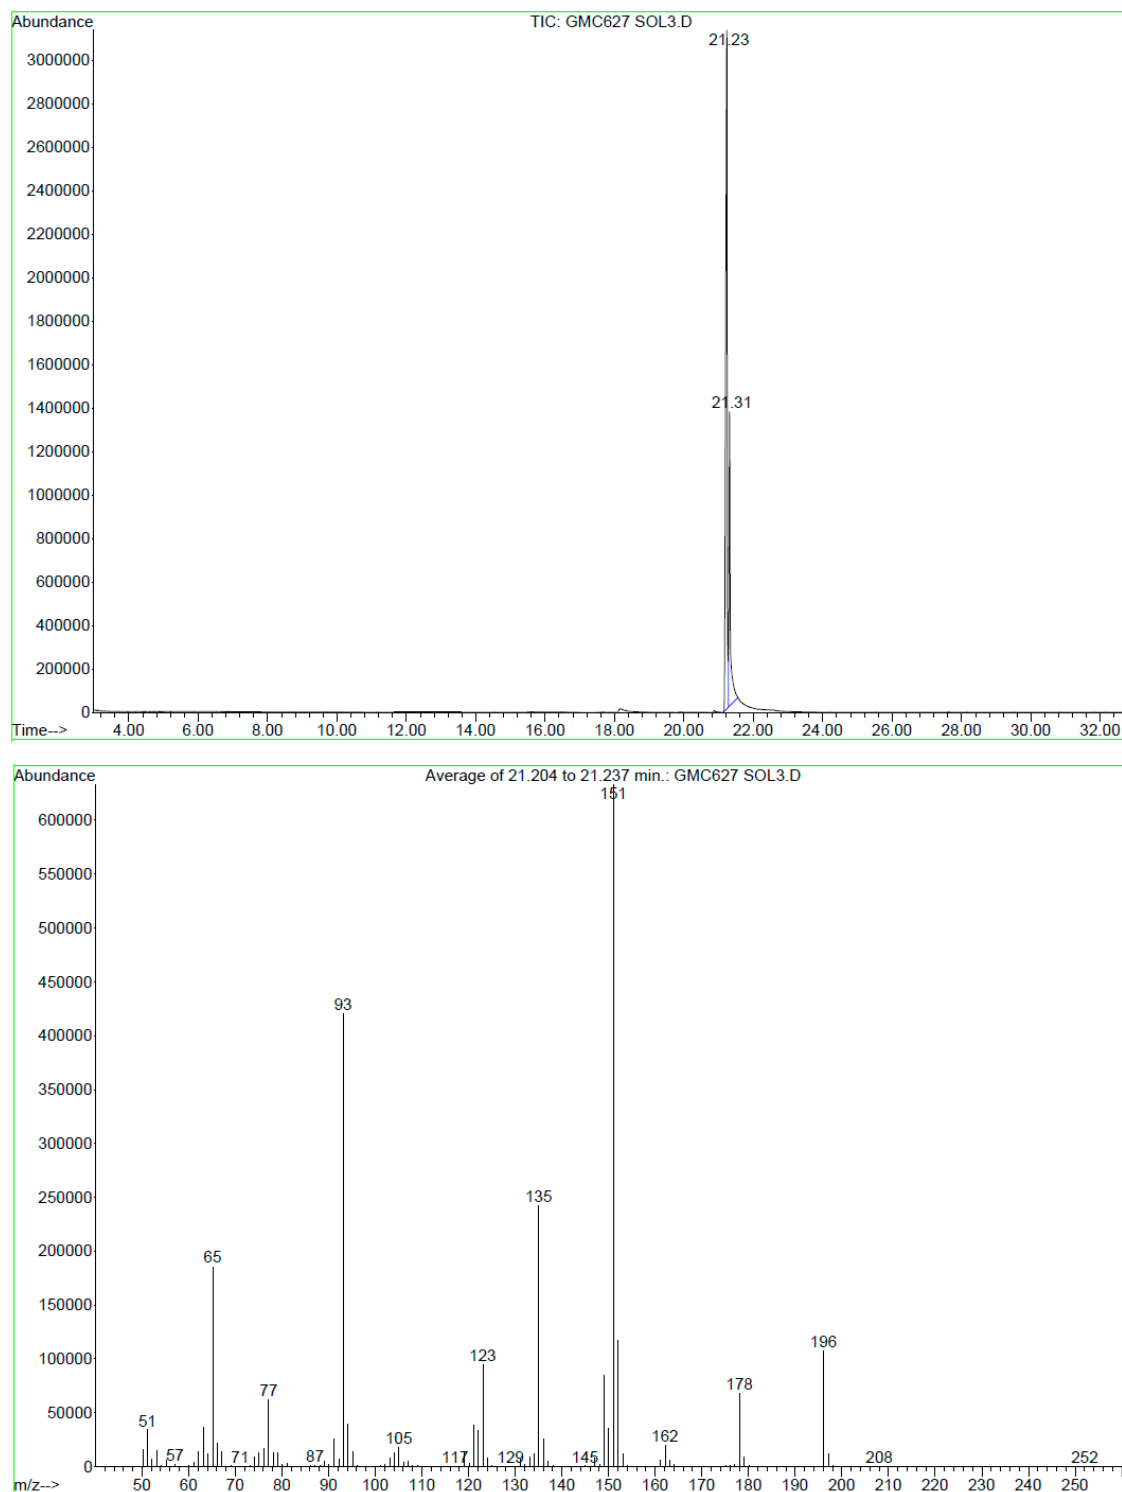

**Figure S8.** GC/MS chromatogram of (1*R*\*,2*S*\*) and (1*R*\*,2*R*\*)-1-(benzo[1,3]dioxol-5-yl)propane-1,2-diol (**1c**).

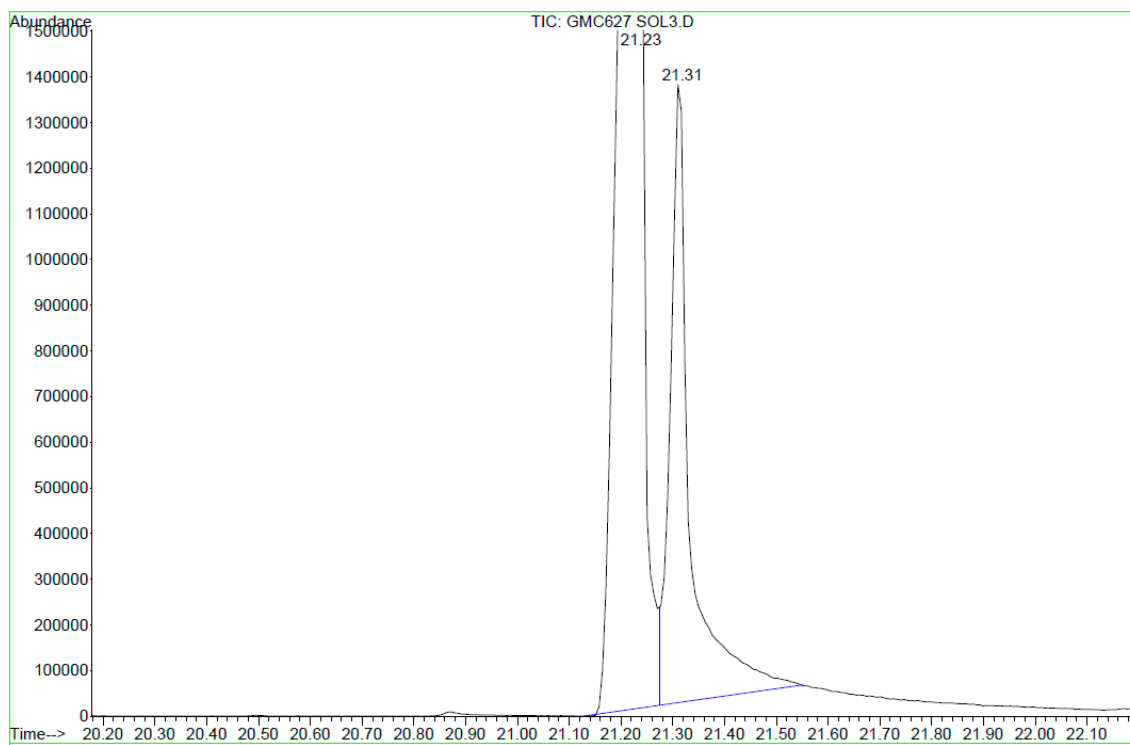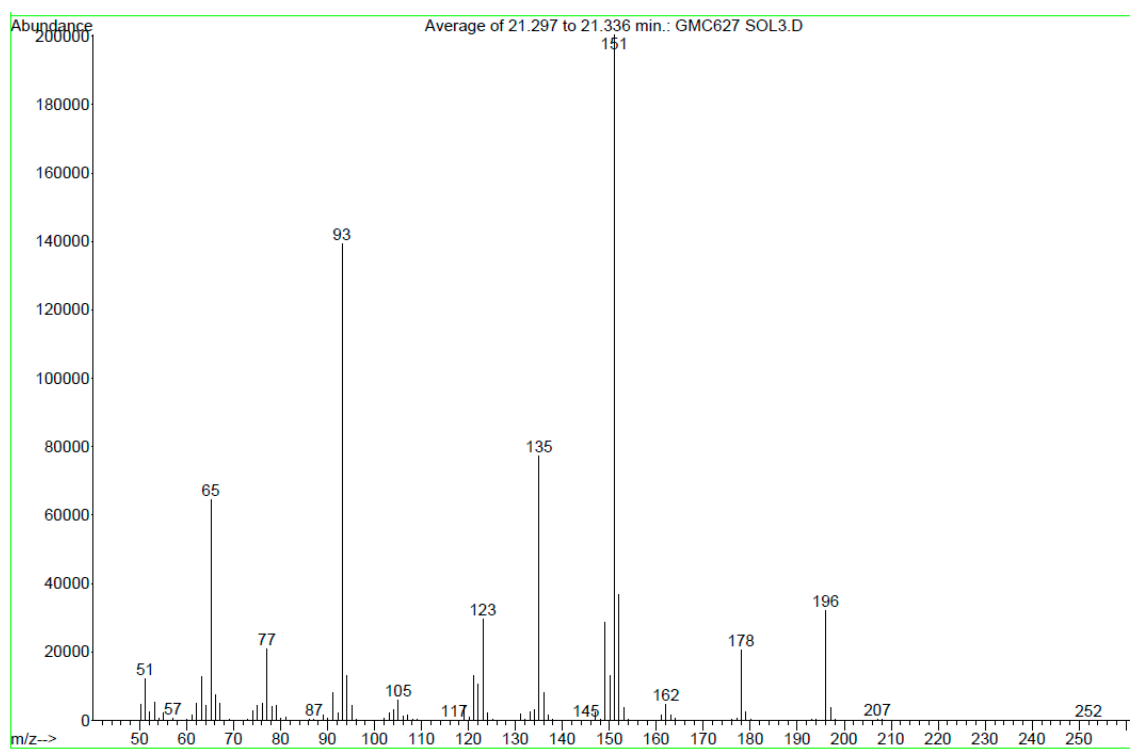

**Figure S9.** GC/MS chromatogram of (1*R*\*,2*S*\*) and (1*R*\*,2*R*\*)-1-(benzo[1,3]dioxol-5-yl)propane-1,2-diol (**1c**).
